# 1 Neutrophil-to-Lymphocyte Ratio as a Prognostic Indicator in COVID-19: Evidence from 2 a Northern Tanzanian Cohort

3

4 Norman J. Kyala<sup>1,2</sup>, Innocent B. Mboya<sup>3</sup>, Elichilia Shao<sup>1,2</sup>, Francis M. Sakita<sup>1,4</sup>, Kajiru G.  
5 Kilonzo<sup>1,2</sup>, , Laura J Shirima<sup>3</sup>, Abid M. Sadiq<sup>1,2</sup>, Elifuraha Mkwizu<sup>1,2</sup>, Nyasatu Chamba<sup>1,2</sup>,  
6 Annette Marandu<sup>1,2</sup>, Sophia Muhali<sup>1,2</sup>, Faryal M Raza<sup>1,2</sup>, Eliasa Ndale<sup>1,2</sup>, Damasi F. Bayo<sup>1,2</sup>,  
7 Daniel P. Mujuni<sup>1,2</sup>, Furaha Lyamuya<sup>1,2</sup>

8

9 <sup>1</sup>Faculty of Medicine, Kilimanjaro Christian Medical University College, Moshi, Tanzania

10 <sup>2</sup>Department of Internal Medicine, Kilimanjaro Christian Medical Centre, Moshi, Tanzania

11 <sup>3</sup>Department of Epidemiology and Biostatistics, Institute of Public Health, Kilimanjaro  
12 Christian Medical University College, Moshi Tanzania

13 <sup>4</sup>Department of Emergency Medicine, Kilimanjaro Christian Medical Centre, Moshi, Tanzania

14 <sup>5</sup>Department of Translational Medicine, Lund University, 202 13 Malmö, Sweden.

15

16 \*Corresponding author: Norman Jonas Kyala

17 E-mail: [normanjonasmd@gmail.com](mailto:normanjonasmd@gmail.com) (NJK)

18 ¶These authors contributed equally to this work.

19 &These authors also contributed equally to this work.

20

21 Author emails:

22 IBM: [innocent.mboya@med.lu.se](mailto:innocent.mboya@med.lu.se)

23 ES: [elichilia@gmail.com](mailto:elichilia@gmail.com)

24 KGK: [mtundumliasi@googlemail.com](mailto:mtundumliasi@googlemail.com)

25 AMS: [abid.physician@gmail.com](mailto:abid.physician@gmail.com)

26 FMS: [francis.sakita@gmail.com](mailto:francis.sakita@gmail.com)

27 SM: [muhalisophia@gmail.com](mailto:muhalisophia@gmail.com)

28 LJS: [shirimalaura@gmail.com](mailto:shirimalaura@gmail.com)

29 EM: [emkwizu@gmail.com](mailto:emkwizu@gmail.com)

30 NC: [nyasatuc@gmail.com](mailto:nyasatuc@gmail.com)

31 AM: [annettemorio@gmail.com](mailto:annettemorio@gmail.com)

32 FMR: [faryalkmp@gmail.com](mailto:faryalkmp@gmail.com)

33 EN: [eliasandale09@gmail.com](mailto:eliasandale09@gmail.com)

34 DFB: [damasflavian@gmail.com](mailto:damasflavian@gmail.com)

NOTE: This preprint reports new research that has not been certified by peer review and should not be used to guide clinical practice.

35 DPM: [danielmujuni13@gmail.com](mailto:danielmujuni13@gmail.com)

36 FL: [fslyamuya@gmail.com](mailto:fslyamuya@gmail.com)

37 **Abstract**

38 **Background:** COVID-19 caused a profound global impact, resulting in significant cases and  
39 deaths. The progression of COVID-19 clinical manifestations is influenced by a dysregulated  
40 inflammatory response. Early identification of the subclinical progression is crucial for timely  
41 intervention and improved patient outcomes. While there are various biomarkers to predict  
42 disease severity and outcomes, their accessibility and affordability pose challenges in resource-  
43 limited settings. We explored the potentiality of the neutrophil-to-lymphocyte ratio (NLR) as  
44 a cost-effective inflammatory marker to predict disease severity, clinical deterioration, and  
45 mortality in affected patients.

46 **Methodology:** A hospital-based retrospective cohort study was conducted at KCMC Hospital  
47 among COVID-19 patients followed from admission to discharge between 1<sup>st</sup> March 2020 and  
48 31<sup>st</sup> March 2022. NLR was calculated as the absolute neutrophil count in  $\mu\text{L}$  divided by the  
49 absolute lymphocyte count in  $\mu\text{L}$ . The NLR cut-off value was determined using Receiver  
50 Operating Characteristic (ROC) analysis and assessed its predictive ability at admission for in-  
51 hospital mortality. The Chi-square test compared the proportion of NLR by patient  
52 characteristics. The association of NLR with disease severity and mortality was analyzed using  
53 the modified Poisson and Cox regression models, respectively.

54 **Results:** The study included 504 patients, with a median age of 64 years, 57.1% were males,  
55 and 68.3% had severe COVID-19. The in-hospital COVID-19 mortality rate was 37.7%. An  
56 NLR cutoff value of 6.1 or higher had a sensitivity of 92.1% (95% CI 89.2%–94.0%) and a  
57 specificity of 92.0% (95% CI 89.7%–94.4%). Additionally, 39.5% of patients with an NLR  
58 value of 6.1 or higher had increased risk of severe disease, subsequent clinical deterioration,  
59 and mortality.

60 **Conclusion and recommendation:** An NLR value of 6.1 or higher at the time of hospital  
61 admission associated with severe disease, clinical deterioration, and mortality in patients with  
62 COVID-19. Integration of NLR as a prognostic parameter in COVID-19 prognosis scales could  
63 improve risk assessment and guide appropriate management strategies for COVID-19 patients,  
64 as well as for potential future viral-related pneumonias. Further prospective studies are  
65 necessary to validate these findings and evaluate the clinical utility of NLR in larger cohorts of  
66 patients.

67 **Keywords:** Neutrophils-to-Lymphocyte ratio, Mortality, Predictors, COVID-19, Tanzania

68

## 69 **Introduction**

70 Coronavirus disease 2019 (COVID-19), caused by the novel severe acute respiratory syndrome  
71 coronavirus 2 (SARS-CoV-2), emerged in Wuhan, China, in late 2019 and became a global  
72 pandemic in March 2020 (1–4). Tanzania reported its first case on March 16, 2020, with 37,091  
73 confirmed cases and 808 deaths as of March 4, 2023 (5).

74 The disease varies widely in clinical presentation as severe cases are at an increased risk of  
75 mortality, hence detecting clinical deterioration early is crucial (6,7). Evidence suggests that  
76 the Neutrophil-to-Lymphocyte Ratio (NLR) may serve as a marker for assessing disease  
77 severity, and predicting clinical deterioration and mortality in COVID-19 patients diseases (8–  
78 18). NLR reflects the balance between neutrophils and lymphocytes in the blood, offering  
79 insights into the immune response and inflammation. It combines changes in neutrophil and  
80 lymphocyte levels, enhancing its sensitivity as an immune response marker (19–21). Clinically,  
81 NLR can stratify patients, aiding in the identification of critically ill individuals (19–21).

82 From an immunological perspective, NLR mirrors the interplay between innate and adaptive  
83 immune responses during illness and pathological stress (21). Notably, changes in the NLR  
84 often occur before the occurrence of the disease's clinical manifestations, enabling early  
85 detection and informing clinicians about the ongoing subclinical pathological processes  
86 (Zahorec, 2001). In the context of SARS-CoV-2 infection, the mechanisms underlying the  
87 response of neutrophils and lymphocytes have been postulated. Neutrophils play a crucial role  
88 in activating the immune system and releasing reactive oxygen species (ROS). These ROS can  
89 cause DNA damage in infected cells, leading to the release of the virus, which can then be  
90 targeted by antibodies. Neutrophils can also stimulate the production of various cytokines like  
91 Interleukin-8 (IL-8), Tumor necrosis factor-alpha (TNF-alpha), and Interleukin-1 beta (IL-1 $\beta$ ),  
92 as well as effector molecules including ROS, defensins, proteases, and nitric oxide (NO).  
93 Conversely, systemic inflammation, particularly elevated Interleukin 6 levels in COVID-19,  
94 paradoxically leads to a decrease in lymphocyte count, thereby impairing cellular immunity.  
95 Both these factors contribute to an elevated NLR (8,22,23).

96 Given NLR's success in predicting disease severity in various conditions, its utility among  
97 COVID-19 patients, particularly in resource-limited settings like Tanzania, deserves  
98 exploration (8–18). The study's importance lies in NLR's simplicity and cost-effectiveness  
99 compared to other inflammatory markers (Zahorec, 2001; Faria, Fernandes, & Silva, 2016;  
100 Gurağaç & Demire, 2016; Sun et al., 2020). It can be calculated from routine blood tests,

101 aiding in the early identification of high-risk patients when used alongside clinical methods. If  
102 backed with evidence, NLR can inform clinical guidelines and algorithms, enhancing COVID-  
103 19 management and resource allocation. This research provides relevant evidence and lays the  
104 foundation for future studies exploring NLR's broader applicability in clinical settings and  
105 monitoring COVID-19 patients (Zahorec, 2001; Faria, Fernandes, & Silva, 2016; Gurağaç &  
106 Demirer, 2016; Sun et al., 2020). The study evaluated NLR as a potential marker for assessing  
107 disease severity and predicting clinical deterioration and mortality among COVID-19 patients  
108 at Kilimanjaro Christian Medical Centre (KCMC) Hospital in Northern Tanzania.

## 109 **Methods**

### 110 Data source and population

111 This research employed a retrospective cohort study design, from March 2020 to March 2022  
112 at KCMC zonal-referral Hospital with a catchment area of 15 million people located in Moshi  
113 Municipality, Kilimanjaro region, northern Tanzania. The hospital has a bed capacity of over  
114 640 beds. The study population consisted of 504 adult patients aged 18 years or older  
115 hospitalized at KCMC with a confirmed COVID-19 diagnosis based on positive RT-PCR or  
116 antigen test results for SARS-CoV-2 conducted by the National Laboratory of Public Health  
117 of Tanzania. We excluded pregnant women, individuals missing baseline neutrophil and/or  
118 lymphocyte data, confirmed hematological malignancies, and receipt of chemotherapy,  
119 immunomodulating drugs, or long-term glucocorticoids, as these conditions could potentially  
120 affect neutrophil, lymphocyte, and platelet counts, leading to inaccurate NLR measurements.

121 Data was collected from 1<sup>st</sup> October 2022 to 31<sup>st</sup> December 2022. Data collection involved  
122 reviewing individual patient clinical files using a data extraction sheet encompassing clinical  
123 and laboratory data, including presenting symptoms, respiratory rate on admission, oxygen  
124 saturation, days from symptom onset to hospitalization, length of hospital stay, treatment  
125 outcomes, age, gender, disease severity, and documented comorbidities. Laboratory data  
126 included hemoglobin level, leukocyte count, thrombocyte count, lymphocyte count, serum  
127 creatinine, urea, aspartate transaminase (AST), and alanine aminotransferase (ALT).

128

### 129 Variables

130 We examined several key variables to investigate the association between NLR with patient's  
131 COVID-19 outcomes. The primary outcomes were COVID-19 severity, clinical deterioration  
132 during hospital admission, and COVID-19-related mortality during hospitalization. COVID-  
133 19 severity was categorized into four levels: mild, moderate, severe, and critical, following the  
134 interim guideline of the WHO for COVID-19 (WHO, 2021). Mild cases were characterized by  
135 symptomatic patients meeting the case definition for COVID-19 without evidence of viral  
136 pneumonia or hypoxia. Moderate cases included patients with clinical signs of pneumonia but  
137 no signs of severe pneumonia, with peripheral capillary oxygen saturation (SpO<sub>2</sub>)  $\geq$  90% on  
138 room air. Severe cases were defined by clinical signs of pneumonia, a respiratory rate  $>$  30  
139 breaths/min, severe respiratory distress, or SpO<sub>2</sub>  $<$  90% on room air (WHO, 2021). Critical  
140 cases were identified by criteria for Acute Respiratory Distress Syndrome (ARDS), sepsis,

141 septic shock, or other conditions necessitating life-sustaining therapies such as mechanical  
142 ventilation (invasive or non-invasive) or vasopressor therapy (WHO, 2021).

143 The primary independent variables examined were the absolute neutrophil count, absolute  
144 lymphocyte count recorded on admission, and the calculated NLR. NLR was calculated by  
145 dividing the absolute neutrophil count in  $\mu\text{L}$  by the absolute lymphocyte count in  $\mu\text{L}$   
146 obtained from the full blood picture of patients upon admission. NLR was analyzed both as a  
147 continuous and categorical variable, with categories of normal NLR and elevated NLR. The  
148 cut-off value for the categorized NLR was determined through the Receiver Operating  
149 Characteristic (ROC) analysis.

#### 150 Data analysis

151 The extracted data were transferred from the Excel spreadsheet to the STATA version 16 for  
152 processing and analysis (24). The Chi-squared test determined the association between NLR  
153 and participant characteristics. The Kruskal-Wallis test was performed to compare the medians  
154 of NLR across groups of patients based on their disease severity and clinical deterioration. For  
155 the assessment of clinical deterioration, the analysis focused on patients admitted with mild  
156 and moderate disease, and then follow-up for clinical outcomes. The outcomes included; those  
157 who did not deteriorate, those who deteriorated but survived, and those who deteriorated and  
158 died.

159 To assess the diagnostic accuracy of NLR in predicting mortality among patients, ROC analysis  
160 was conducted. Sensitivity and specificity values were determined, allowing for the  
161 identification of a reliable threshold for predicting COVID-19 patient mortality during  
162 admission based on their NLR values. The association of elevated NLR above the cut-off value  
163 with disease severity was examined using the modified Poisson regression model. The  
164 association of NLR above the cut-off value with mortality was investigated using Cox  
165 regression models. All regression models were adjusted for all statistical tests were two-sided  
166 at a 5% threshold level.

167

#### 168 Ethical consideration

169 Ethical approval was obtained from the Kilimanjaro Christian Medical University College  
170 Research and Ethics Review Committee with approval no PG/91/2022. Permission to extract  
171 hospital data was obtained from the Director of Hospital Services through the Head of the

172 Department of Internal Medicine at KCMC. Unique patient identification instead of hospital  
173 medical record numbers were used to maintain confidentiality.

174



175 **Results**

176 574 confirmed COVID-19 patients were admitted to KCMC Hospital between March 2020 and  
177 March 2022, among those 504 patients were enrolled in the study after meeting the inclusion  
178 criteria. The median age of the cohort was 64 years with an interquartile range (IQR) of 53-75  
179 years. Among these patients, 60% were at least 61 years old, and 57.1% were males, as shown  
180 in Table 1.

181 The median NLR values increased as the COVID-19 severity increased. Patients in the critical  
182 group had the highest median NLR of 13.6 (IQR 10.3–25.9), whereas patients with mild disease  
183 had a median NLR of 2.1 (IQR 1.7–3.4), with a p-value < 0.001 (figure 1).

184 Regarding clinical deterioration during hospital stay; in patients admitted with mild and  
185 moderate COVID-19 higher NLR during admission was significantly associated with clinical  
186 deterioration and progression to poor outcomes. Specifically, for patients with mild and  
187 moderate COVID-19 during admission who did not deteriorate during their hospital stay, their  
188 median NLR was 1.9 (IQR 1.4–2.6). For those who deteriorated to severe or critical disease  
189 but were discharged alive, the median NLR was 5.6 (IQR 4.4–6.2). For patients who were  
190 admitted and deteriorated to severe/critical disease and subsequently passed away, the median  
191 NLR was 13.5 (IQR 6.4–24.5) (as shown in figure 2).

192 The NLR cut-off in predicting mortality due to COVID-19 determined by ROC analysis was  
193 6.10 with a sensitivity of 92.1% (95% CI 89.2%–94.0%) and a specificity of 92.0% (95% CI  
194 89.7%–94.4%). The AUC was 0.9207 (95% CI 0.896–0.945). The high sensitivity and  
195 specificity values suggest that the NLR cut-off of 6.1 can be considered as a threshold for  
196 predicting the mortality of COVID-19 patients at admission (Figure 3) .

197 The distribution of NLR across background characteristics of COVID-19 patients admitted at  
198 KCMC Hospital showed that out of 504 patients, 199 patients (39.5%) had a higher NLR (6.1  
199 or above). Patients aged 61 years and above had the highest proportion of NLR of 6.1 or above,  
200 with 139 patients (69.8%) (p-value=0.001) compared to other age groups. Although males  
201 showed a slightly higher proportion of NLR of 6.1 or above 116 (40.3%) compared to females  
202 83 (38.4%), the difference was not statistically significant. The second wave of COVID-19 had  
203 the highest proportion of patients with NLR of 6.1 or above 85 (44.7%) compared to other  
204 waves of COVID-19 (p-value=0.04) (Table 1).

205 In terms of COVID-19 severity, a higher proportion of patients with mild COVID-19 had NLR  
206 below 6.1 (35 or 92.1%). It is interesting to note that among patients with severe and critical  
207 COVID-19, 159 (46.2%) and 17 (79.9%) had NLR of 6.1 and above (Table 2).

208 Of all 504 patients, 140 (27.8) were admitted with mild and moderate disease. Among those  
209 who deteriorated and survived 8 (25.8%) had NLR of 6.1 and above compared to 14 (73.7%)  
210 in patients who deteriorated and died ( $p < 0.001$ ), suggesting higher NLR to be associated with  
211 poor progression of COVID-19 (Table 2).

212 Among the patients who died during their hospital stay, a majority of 175 (91.6%) had an NLR  
213 of 6.1 or higher,  $p\text{-value} < 0.001$ ) (Table 2).

214 Individuals with a baseline NLR of 6.1 or above had a 1.43 times higher risk of developing  
215 severe and critical disease than their counterparts (RR 1.43; 95% CI 1.29–1.58,  $p\text{-value} =$   
216  $< 0.001$ ). In addition, in the multivariable analysis, only the second and fourth waves and  
217 hypertension exhibited a significant positive association with severe and critical disease (Table  
218 3). Regarding COVID-19 mortality, the adjusted analysis showed that NLR had a positive  
219 association with mortality. For every unit increase in NLR, the mortality risk increased by 1.03  
220 (AHR 1.03; 95% CI 1.02–1.04,  $p\text{-value} < 0.001$ ). Other factors associated with higher  
221 mortality included age  $> 60$  years, longer duration since the first symptom, severe disease, and  
222 third COVID-19 wave (Table 4).

223

## 224 Discussion

225 NLR value of 6.1 was found to be the threshold value for predicting the mortality of COVID-  
226 19 patients during admission. Higher NLR values were observed in patients who were 61 years  
227 old and above, males, those affected during the second wave of the outbreak, and those with  
228 hypertension. However, only age and the waves of the outbreak showed a significant  
229 association with NLR distribution. Also, higher values of NLR were found in a higher  
230 proportion among patients with severe and critical COVID-19, those who were admitted with  
231 mild and moderate disease later deteriorated to severe form of illness, and those who died.  
232 Additionally, mortality risk increased with NLR increase. xx

233

234 The optimal cutoff value of NLR for predicting mortality in COVID-19 patients, a cutoff value  
235 of 6.1 or higher, demonstrated a high sensitivity of 92.1% and specificity of 92.0%. The high  
236 sensitivity and specificity suggest that NLR can serve as a valuable prognostic marker for  
237 identifying patients at higher risk of death. However, it is important to note that when  
238 comparing our results with studies conducted in different settings, we observed variations in  
239 the determined cutoff values for NLR. For instance, Prozan et al (2021), in their retrospective  
240 cohort study at Tel Aviv Medical Center, identified an optimal cutoff value of 6.8 for predicting  
241 poor clinical outcomes in COVID-19 patients, with a sensitivity of 67% and a specificity of  
242 64%, yielding an AUC of 68.1%, (25). Similarly, Yildiz et al (2021) in their validation study in  
243 Boston, USA, found an optimal cutoff value of 5.9 for predicting mortality, with a sensitivity  
244 of 62% and a specificity of 64%, resulting in an AUC of 0.6653 (26). Furthermore, Citu et al  
245 (2022), in an observational study conducted in Romania, identified a much higher optimal  
246 cutoff value of 9.1 for predicting mortality, with a sensitivity of 70% and a specificity of 67%,  
247 and an AUC of 68.9% (27). These discrepancies highlight the context-specific nature of the  
248 NLR cutoff value in predicting mortality in COVID-19 patients. Several factors, such as  
249 genetic variations, methodological differences, and geographical locations, could contribute to  
250 the observed variations Yildiz et al (2021)(26). It is crucial to consider these factors when  
251 interpreting and applying NLR as a prognostic marker in different clinical settings.

252 Higher NLR values were significantly associated with an increase in disease severity.  
253 Specifically, patients with a baseline NLR of 6.1 and above were found to have a 1.43 times  
254 higher risk of developing severe and critical disease compared to those with a baseline NLR of  
255 less than 6.1. This association remained statistically significant even after adjusting for age,  
256 sex, COVID-19 wave, and specific comorbidities. As the severity of COVID-19 increased, the

257 median NLR values were higher, indicating a positive correlation. These findings support the  
258 potential of NLR as an indicator of disease severity in COVID-19 patients. Several studies  
259 reported similar associations between NLR and disease severity in COVID-19 patients. For  
260 example, Huang et al. (2020) in China found higher NLR values in severe and critical cases  
261 compared to mild cases(28) while Yilmaz et al. (2020) in Turkey demonstrated an increasing  
262 trend of NLR values with disease severity (29). These studies collectively support the notion  
263 that NLR is associated with disease severity in COVID-19. Meta-analyses conducted by Feng  
264 et al. (2020) and Ulloque-Badaracco et al. (2021) also support the strong associations between  
265 elevated NLR and increased disease severity, further confirming the significance of NLR in  
266 assessing disease severity (30,31). Despite variations in NLR values, the consistent trend of  
267 higher NLR values corresponding to increased disease severity indicates the potential utility of  
268 NLR as an indicator for assessing disease severity in COVID-19 patients.

269 A significant association between baseline NLR and the subsequent deterioration of COVID-  
270 19 patients with mild and moderate disease to severe and critical stages or death was observed.  
271 Among patients with mild and moderate disease who later deteriorated, those who were  
272 discharged alive had lower median NLR values compared to those who did not survive. **Similar**  
273 **findings were reported in China** where higher median NLR values at admission increased the  
274 risk of clinical deterioration (32).

275  
276 Furthermore, on the association between NLR and mortality in patients with COVID-19, for  
277 each unit increase in NLR, the risk of in-hospital death increased by a factor of 1.03. This  
278 finding is supported by previous studies documenting higher in-hospital mortality risk for  
279 patients with higher NLR (Ye et al., 2020; Archana, Shyamsunder and Das, 2021; Liu et al.,  
280 2021).

281 The underlying mechanisms explaining the observed outcomes can be attributed to the role of  
282 NLR as an indicator of systemic inflammation and immune dysregulation in COVID-19.  
283 Elevated NLR values reflect an imbalance between neutrophil and lymphocyte counts,  
284 suggesting an exaggerated inflammatory response and compromised immune function. This  
285 dysregulation can contribute to the severity of COVID-19 and increase the risk of adverse  
286 outcomes, including disease severity, clinical deterioration, and mortality.

287 **Conclusion**

288 Our study demonstrated a significant association between the NLR and disease severity,  
289 clinical deterioration, and mortality in COVID-19 patients. Higher NLR values were positively  
290 associated with more severe disease and clinical deterioration. An NLR value of 6.1 or higher  
291 predicted higher mortality risk and had high sensitivity and specificity. These findings suggest  
292 the potential of NLR as a prognostic marker and highlight its potential as a reliable indicator  
293 for assessing disease severity, monitoring clinical progression, and identifying patients at  
294 higher risk of adverse outcomes, aiding in the effective management and treatment of COVID-  
295 19. Further research is warranted to explore the underlying mechanisms and validate the utility  
296 of NLR in larger and more diverse patient cohorts.

297

298

299 Availability of data and materials

300 Data will be made available

301 Competing Interest

302 None of the authors has any conflict of interest in the content of this manuscript.

303 Acknowledgment

304 We acknowledge all doctors at KCMC who took part in data collection and all patients whose  
305 information enabled the availability of data used in this study. The authors also thank the  
306 KCMC isolation team for capturing these data in the electronic system.

307 Author's contributions

308 contributed to the design of the study. performed the statistical analysis and drafted the  
309 manuscript. participated in the statistical analysis and drafting of the manuscript. edited the  
310 final draft of the manuscript and approved the final manuscript.

311 REFERENCES

- 312 1. Baloch S, Baloch MA, Zheng T, Pei X. The Coronavirus Disease 2019 (COVID-19)  
313 Pandemic. *Tohoku J Exp Med* [Internet]. 2020 [cited 2023 Jun 21];250(4):271–8.  
314 Available from: <https://pubmed.ncbi.nlm.nih.gov/32321874/>
- 315 2. Cucinotta D, Vanelli M. WHO Declares COVID-19 a Pandemic. *Acta Biomed*  
316 [Internet]. 2020 [cited 2023 Jun 21];91(1):157–60. Available from:  
317 <https://pubmed.ncbi.nlm.nih.gov/32191675/>
- 318 3. Al-Dadah O, Hing C. Novel Coronavirus (COVID-19): A Global Pandemic. *Knee*.  
319 2020 Mar 1;27(2):279.
- 320 4. Garosi VH, Tanhaie S, Chaboksavar F, Kamari T, Gheshlaghi PA, Toghroli R, et al.  
321 An overview of 2019 novel coronavirus COVID-19 pandemic: A review study. *J Educ*  
322 *Health Promot* [Internet]. 2021 Jul 1 [cited 2023 Jun 21];10(1). Available from:  
323 <https://pubmed.ncbi.nlm.nih.gov/34485577/>
- 324 5. Ministry of Health Tanzania. THE UNITED REPUBLIC OF TANZANIA MINISTRY  
325 OF HEALTH COVID-19 WEEKLY SITUATION REPORT: NO. 77. Dodoma; 2023  
326 Mar.
- 327 6. Wang D, Hu B, Hu C. Clinical Characteristics of 138 Hospitalized Patients With 2019  
328 Novel Coronavirus-Infected Pneumonia in Wuhan, China. *JAMA*. 2020;
- 329 7. WHO. Clinical management Clinical management : Living guidance COVID-19.  
330 World Health Organization. 2021;(January).
- 331 8. Brüßow H. Immunology of COVID-19. *Environ Microbiol*. 2020 Dec 1;22(12):4895–  
332 905.
- 333 9. Mutinelli-Szymanski P, Hude I, Merle E, Lombardi Y, Seris P, Abtahi M, et al.  
334 Neutrophil:lymphocyte ratio predicts short-term outcome of COVID-19 in  
335 haemodialysis patients. *Clin Kidney J* [Internet]. 2021 Feb 3 [cited 2021 Nov  
336 25];14(1):124–31. Available from:  
337 <https://academic.oup.com/ckj/article/14/1/124/5998261>
- 338 10. Guthrie GJ, Charles KA, Roxburgh CS, Horgan PG, McMillan DC, Clarke SJ. The  
339 systemic inflammation-based neutrophil-lymphocyte ratio: experience in patients with  
340 cancer. *Crit Rev Oncol Hematol*. 2013;88:218–30.
- 341 11. Giede-Jeppe A, Bobinger T, Gerner ST, Sembill JA, Sprügel MI, Beuscher VD, et al.  
342 Neutrophil-to-Lymphocyte Ratio Is an Independent Predictor for In-Hospital Mortality  
343 in Spontaneous Intracerebral Hemorrhage. *Cerebrovascular Diseases*. 2017;44(1–  
344 2):26–34.
- 345 12. Azab B, Zaher M, Weiserbs KF. Usefulness of neutrophil to lymphocyte ratio in  
346 predicting short- and long-term mortality after non-ST-elevation myocardial infarction.  
347 *Am J Cardiol*. 2010;106:470–6.
- 348 13. Ha YJ, Hur J, Go DJ. Baseline peripheral blood neutrophil-to-lymphocyte ratio could  
349 predict survival in patients with adult polymyositis and dermatomyositis: A  
350 retrospective observational study. *PLoS One*. 2018;13.



- 351 14. Liu Y, Du X, Chen J, Jin Y, Peng L, Wang HHX, et al. Neutrophil-to-lymphocyte ratio  
352 as an independent risk factor for mortality in hospitalized patients with COVID-19.  
353 *Journal of Infection*. 2020 Jul 1;81(1):e6–12.
- 354 15. Chen G, Zhu L, Yang Y, Long Y, Li X, Wang Y. Prognostic role of neutrophil to  
355 lymphocyte ratio in ovarian cancer: A meta-analysis. *Technol Cancer Res Treat*. 2018  
356 Jan 1;17.
- 357 16. Nishita M, Park SY, Nishio T, Kamizaki K, Wang Z, Tamada K, et al. The relationship  
358 between hematological indices and autoimmune rheumatic diseases (ARDs), a meta-  
359 analysis. *Sci Rep*. 2017;7(1):1–9.
- 360 17. Xiaohong Y, Peng L, Yuwei L. Application of neutrophil-lymphocyte ratio in the  
361 diagnosis of influenza in preschool children. *Am J Health Res*. 2019;7(6):100–3.
- 362 18. Zhang Y, Zou P, Gao H, Yang M, Yi P, Gan J, et al. Neutrophil–lymphocyte ratio as  
363 an early new marker in AIV-H7N9-infected patients: A retrospective study. *Ther Clin*  
364 *Risk Manag*. 2019;15:911.
- 365 19. Zahorec R. Ratio of neutrophil to lymphocyte counts--rapid and simple parameter of  
366 systemic inflammation and stress in critically ill. *Bratisl Lek Listy*. 2001;102(1):5–14.
- 367 20. Gūrağaç A, Demirer Z. The neutrophil-to-lymphocyte ratio in clinical practice.  
368 *Canadian Urological Association Journal* [Internet]. 2016 Apr 1 [cited 2022 Mar  
369 24];10(3–4):141. Available from: /pmc/articles/PMC4839997/
- 370 21. Faria SS, Fernandes PJ, Silva MJ. The neutrophil-to-lymphocyte ratio: a narrative  
371 review. *Ecancermedicalsecience*. 2016;10:702.
- 372 22. Maddani SS, Gupta N, Umakanth S, Joylin S, Saravu K. Neutrophil–Lymphocyte  
373 Ratio in Patients with COVID-19 as a Simple Tool to Predict Requirement of  
374 Admission to a Critical Care Unit. *Indian J Crit Care Med* [Internet]. 2021 [cited 2022  
375 Mar 20];25(5):535. Available from: /pmc/articles/PMC8196394/
- 376 23. Qin C, Zhou L, Hu Z. Dysregulation of immune response in patients with COVID-19  
377 in Wuhan, China. *Clin Infect Dis*. 2020;
- 378 24. StataCorp. *Stata Statistical Software*: College Station, TX: StataCorp LLC; 2019.
- 379 25. Prozan L, Shusterman E, Ablin J, Mitelpunkt A, Weiss-Meilik A, Adler A, et al.  
380 Prognostic value of neutrophil-to-lymphocyte ratio in COVID-19 compared with  
381 Influenza and respiratory syncytial virus infection. *Scientific Reports* 2021 11:1  
382 [Internet]. 2021 Nov 2 [cited 2023 Jun 8];11(1):1–8. Available from:  
383 <https://www.nature.com/articles/s41598-021-00927-x>
- 384 26. Yildiz H, Castanares-Zapatero D, Pierman G, Pothen L, De Greef J, Nana FA, et al.  
385 Validation of Neutrophil-to-Lymphocyte Ratio Cut-off Value Associated with High  
386 In-Hospital Mortality in COVID-19 Patients. *Int J Gen Med* [Internet]. 2021 [cited  
387 2023 Jun 8];14:5111. Available from: /pmc/articles/PMC8420786/



- 388 27. Citu C, Gorun F, Motoc A, Sas I, Gorun OM, Burlea B, et al. The Predictive Role of  
389 NLR, d-NLR, MLR, and SIRI in COVID-19 Mortality. *Diagnostics* [Internet]. 2022  
390 Jan 1 [cited 2023 Jun 8];12(1). Available from: [/pmc/articles/PMC8774862/](https://pmc/articles/PMC8774862/)
- 391 28. Huang S, Liu M, Li X, Shang Z, Zhang T, Lu H. Significance of neutrophil-to-  
392 lymphocyte ratio, platelet-to-lymphocyte ratio for predicting clinical outcomes in  
393 COVID-19. *medRxiv* [Internet]. 2020 May 8 [cited 2022 Mar  
394 24];2020.05.04.20090431. Available from:  
395 <https://www.medrxiv.org/content/10.1101/2020.05.04.20090431v1>
- 396 29. Yılmaz E, Ak R, Doğanay F. Usefulness of the neutrophil-to-lymphocyte ratio in  
397 predicting the severity of COVID-19 patients: a retrospective cohort study. *São Paulo*  
398 *Medical Journal* [Internet]. 2022 [cited 2023 Jun 21];140(1):81. Available from:  
399 [/pmc/articles/PMC9623832/](https://pmc/articles/PMC9623832/)
- 400 30. Feng X, Li S, Sun Q, Zhu J, Chen B, Xiong M, et al. Immune-inflammatory  
401 parameters in COVID-19 cases: A systematic review and meta-analysis. *Front Med.*  
402 2020;7:301.
- 403 31. Ulloque-Badaracco JR, Ivan Salas-Tello W, Al-kassab-Córdova A, Alarcón-Braga EA,  
404 Benites-Zapata VA, Maguiña JL, et al. Prognostic value of neutrophil-to-lymphocyte  
405 ratio in COVID-19 patients: A systematic review and meta-analysis. *Int J Clin Pract*  
406 [Internet]. 2021 Nov 1 [cited 2022 Mar 24];75(11):e14596. Available from:  
407 <https://onlinelibrary.wiley.com/doi/full/10.1111/ijcp.14596>
- 408 32. Xu J bo, Xu C, Zhang R bing, Wu M, Pan C kun, Li X jie, et al. Associations of  
409 procalcitonin, C-reaction protein and neutrophil-to-lymphocyte ratio with mortality in  
410 hospitalized COVID-19 patients in China. *Scientific Reports* 2020 10:1 [Internet].  
411 2020 Sep 14 [cited 2023 Jun 8];10(1):1–10. Available from:  
412 <https://www.nature.com/articles/s41598-020-72164-7>
- 413 33. Liu L, Zheng Y, Cai L, Wu W, Tang S, Ding Y, et al. Neutrophil-to-lymphocyte ratio,  
414 a critical predictor for assessment of disease severity in patients with COVID-19. *Int J*  
415 *Lab Hematol.* 2021 Apr 1;43(2):329–35.
- 416 34. Ye W, Chen G, Li X, Lan X, Ji C, Hou M, et al. Dynamic changes of D-dimer and  
417 neutrophil-lymphocyte count ratio as prognostic biomarkers in COVID-19. *Respir Res.*  
418 2020 Jul 3;21(1).
- 419 35. Archana B, Shyamsunder S, Das R. Validity of Markers and Indexes of Systemic  
420 Inflammation in Predicting Mortality in COVID-19 infection: A Hospital based Cross  
421 Sectional Study. *Journal of Cardiac and Pulmonary Rehabilitation* [Internet]. 2021 Sep  
422 13 [cited 2022 Jul 16];5(4):1–6. Available from: [https://www.omicsonline.org/open-  
423 access/validity-of-markers-and-indexes-of-systemic-inflammation-in-predicting-  
424 mortality-in-covid19-infection-a-hospital-based-cross-secti-117335.html](https://www.omicsonline.org/open-access/validity-of-markers-and-indexes-of-systemic-inflammation-in-predicting-mortality-in-covid19-infection-a-hospital-based-cross-secti-117335.html)

425

426

427

428 Table 1: Distribution of NLR across background characteristics of COVID-19 patients  
429 admitted at KCMC Hospital between March 2020 to March 2022 (N=504)

| Characteristic         | Total        | NLR                |                    | *P- value |
|------------------------|--------------|--------------------|--------------------|-----------|
|                        |              | NLR < 6.1<br>n (%) | NLR ≥ 6.1<br>n (%) |           |
| Age (years)            |              |                    |                    |           |
| Median (IQR)           | 64 (53 – 75) | xx                 |                    |           |
| 18 – 30                | 19 (3.6)     | 11 (61.1)          | 8 (38.9)           | 0.001     |
| 31 – 60                | 183 (36.4)   | 131 (71.6)         | 52 (28.4)          |           |
| 61 and above           | 302 (60)     | 163 (54)           | 139 (46)           |           |
| Sex                    |              |                    |                    |           |
| Male                   | 288 (57.1)   | 172 (59.7)         | 116 (40.3)         | 0.674     |
| Female                 | 216 (42.9)   | 133 (61.6)         | 83 (38.4)          |           |
| COVID-19 Waves         |              |                    |                    |           |
| Wave 1                 | 111 (22.0)   | 80 (72.1)          | 31 (27.9)          | 0.036     |
| Wave 2                 | 190 (37.7)   | 105 (55.3)         | 85 (44.7)          |           |
| Wave 3                 | 119 (23.6)   | 70 (58.8)          | 49 (41.2)          |           |
| Wave 4                 | 84 (16.7)    | 50 (59.5)          | 34 (40.5)          |           |
| Comorbidities (Yes)    |              |                    |                    |           |
| Diabetes mellitus      | 160 (31.8)   | 93 (58.1)          | 67 (41.9)          | 0.454     |
| Hypertension           | 260 (51.6)   | 154 (60.5)         | 106 (40.5)         | 0.542     |
| HIV/AIDS               | 13 (2.6)     | 9 (69.2)           | 4 (30.8)           | 0.232     |
| Chronic kidney disease | 34 (6.8)     | 19 (55.9)          | 15 (39.1)          | 0.576     |
| Other comorbidities    | 14 (2.8)     | 9 (64.3)           | 5 (36.7)           | 0.563     |

430 Abbreviations: HIV/AIDS, Human Immunodeficiency Virus / Acquired Immunodeficiency Syndrome. NLR,  
431 Neutrophil to Lymphocyte Ratio. \*P-value from the Chi-squared distribution.

432

433

434 Table 2: Distribution of NLR across clinical outcomes of patients admitted with COVID-19 at  
435 KCMC hospital between March 2020 to March 2022. (N = 504)

| Clinical outcome               | Total      | NLR                  |                      | *P-value |
|--------------------------------|------------|----------------------|----------------------|----------|
|                                |            | NLR < 6.1<br>n = 305 | NLR ≥ 6.1<br>n = 199 |          |
| COVID-19 Severity              |            |                      |                      |          |
| Mild                           | 38 (7.5)   | 35 (92.1)            | 3 (7.9)              | <0.001   |
| Moderate                       | 102 (20.2) | 82 (80.4)            | 20 (19.6)            |          |
| Severe                         | 344 (68.3) | 185 (53.8)           | 159 (46.2)           |          |
| Critical                       | 20 (4.0)   | 3 (15)               | 17 (85)              |          |
| Clinical deterioration (n=xxx) |            |                      |                      |          |
| No                             | 90 (64.3)  | 89 (98.9)            | 1 (1.1)              | <0.001   |
| Yes, and discharged alive      | 31 (22.1)  | 23 (74.2)            | 8 (25.8)             |          |
| Yes, and dead                  | 19 (13.6)  | 5 (26.3)             | 14 (73.7)            |          |
| Mortality from COVID-19        |            |                      |                      |          |
| Dead                           | 190 (37.7) | 16 (8.4)             | 174 (91.6)           |          |
| Alive                          | 314 (62.3) | 289 (92.0)           | 25 (8.0)             | <0.001   |

436 Abbreviations: NLR, Neutrophil to Lymphocyte Ratio. \*P-value from the Chi-squared distribution.

437  
438  
439  
440

441 Table 4: Factors associated with Severe Disease in Patients Admitted with COVID-19 at  
442 KCMC Hospital: March 2020 to March 2022 (N = 504)

| Variable                  | CRR (95% CI)       | P-Value | ARR* (95% CI)      | P-value |
|---------------------------|--------------------|---------|--------------------|---------|
| <b>NLR</b>                |                    |         |                    |         |
| Normal NLR                | 1                  |         | 1                  |         |
| Elevated NLR              | 1.43 (1.29 – 1.58) | < 0.001 | 1.39 (1.26 – 1.55) | <0.001  |
| <b>Age Groups (Years)</b> |                    |         |                    |         |
| 18 - 30                   | 1                  |         | 1                  |         |
| 31 - 60                   | 1.11 (0.76 – 1.62) | 0.596   | 1.07 (0.75 – 1.53) | 0.713   |
| 61 and above              | 1.23 (0.84 – 1.80) | 0.269   | 1.10 (0.78 – 1.56) | 0.59    |
| <b>Sex</b>                |                    |         |                    |         |
| Male                      | 0.98 (0.89 – 1.10) | 0.841   | 1.02 (0.92 -1.14)  | 0.687   |
| Female                    | 1                  |         | 1                  |         |
| <b>Comorbidity</b>        |                    |         |                    |         |
| Hypertension              | 1.12 (1.00 – 1.25) | 0.044   | 1.12 (1– 1.25)     | 0.054   |
| Diabetes Mellitus         | 1.04(0.93 – 1.17)  | 0.453   | 1 (0.89 – 1.12)    | 0.944   |
| HIV/AIDS                  | 0.68 (0.21 – 2.18) | 0.518   | 0.98 (0.87 – 1.1)  | 0.747   |
| Chronic Kidney Disease    | 0.88 (0.69 – 1.15) | 0.366   | 0.85 (0.66 -1.1)   | 0.228   |
| Other comorbidities       | 0.69 (0.23 – 2.21) | 0.527   | 0.98 (0.89 – 1.12) | 0.821   |
| <b>COVID-19 Waves</b>     |                    |         |                    |         |
| Wave 1                    | 1                  |         | 1                  |         |
| Wave 2                    | 1.32 (1.11 – 1.56) | 0.002   | 1.24 (1.04 – 1.47) | 0.015   |
| Wave 3                    | 1.19 (0.98 – 1.44) | 0.081   | 1.13 (0.93 – 1.36) | 0.216   |
| Wave 4                    | 1.30 (1.07 – 1.58) | 0.007   | 1.24 (1.02 – 1.50) | 0.029   |

443 Abbreviations: CRR, Crude Relative Risk. ARR, Adjusted Relative Risk. CI, Confidence Intervals. NLR,  
444 Neutrophil to Lymphocyte Ratio. HIV/AIDS, Human Immunodeficiency Virus / Acquired Immunodeficiency  
445 Syndrome. Adjusted risk ratios derived from the Modified Poisson Regression Model (the generalized linear  
446 regression model with the Poisson family and log link function). \* Model adjusted for age groups, sex, co-  
447 morbidities, and COVID-19 waves.  
448

449

450 Table 5: NLR and other factors associated with in-hospital death AMONG patients admitted  
451 with COVID-19 at KCMC hospital (N = 504)

| Variable   | CHR (95%CI)        | P-value | AHR (95%CI)        | P-value |
|------------|--------------------|---------|--------------------|---------|
| NLR        | 1.03 (1.027-1.036) | <0.001  | 1.03 (1.021-1.038) | <0.001  |
| <b>Age</b> |                    |         |                    |         |
| 18-30      | 0.83 (0.385-1.777) | 0.63    | 1.68 (0.835-3.360) | 0.15    |
| 31-60      | 0.46 (0.331-0.648) | <0.001  | 0.53 (0.365-0.761) | <0.001  |
| >60        | 1.00               |         | 1                  |         |
| <b>Sex</b> |                    |         |                    |         |
| Female     | 1                  |         | 1                  |         |
| Male       | 1.12 (0.838-1.501) | 0.44    | 1.08 (0.790-1.469) | 0.64    |

Duration since first symptoms  
(days)

|                                   |                    |        |                    |        |
|-----------------------------------|--------------------|--------|--------------------|--------|
| ≤7                                | 1                  |        | 1                  |        |
| 8-14                              | 0.51 (0.349-0.749) | 0.001  | 0.51 (0.341-0.758) | 0.001  |
| 15-21                             | 0.39 (0.197-0.765) | 0.006  | 0.36 (0.188-0.699) | 0.002  |
| ≥22                               | 0.21 (0.096-0.456) | <0.001 | 0.21 (0.093-0.339) | <0.001 |
| Disease severity                  |                    |        |                    |        |
| Mild and moderate                 | 1                  |        | 1                  |        |
| Severe and critical               | 3.52 (2.162-5.715) | <0.001 | 2.74 (1.694-4.437) | <0.001 |
| COVID-19 Waves                    |                    |        |                    |        |
| Wave 1                            | 1                  |        | 1                  |        |
| Wave 2                            | 1.84 (1.175-2.880) | 0.01   | 1.10 (0.662-1.845) | 0.70   |
| Wave 3                            | 2.29 (1.428-3.666) | 0.001  | 0.94 (0.547-1.611) | 0.82   |
| Wave 4                            | 2.57 (1.553-4.252) | <0.001 | 1.87 (1.178-2.979) | 0.01   |
| Comorbidity                       |                    |        |                    |        |
| Diabetes (yes)                    | 1.14 (0.848-1.546) | 0.38   |                    |        |
| Asthma/chronic lung disease (yes) | 1.03 (0.508-2.099) | 0.93   |                    |        |
| HIV (yes)                         | 0.68 (0.251-1.828) | 0.44   |                    |        |
| Other comorbidities (yes)         | 0.69 (0.253-1.924) | 0.53   |                    |        |
| Hypertension (yes)                | 1.24 (0.930-1.660) | 0.14   | 1.10 (0.800-1.500) | 0.57   |

452 Abbreviations: CHR, Crude Hazard Ratio. AHR, Adjusted Hazard Ratio. CI, Confidence Intervals. NLR,  
453 Adjusted hazard ratios derived from the Modified Poisson Regression Model (the generalized linear regression  
454 model with the Poisson family and log link function). \* Model adjusted for age groups, sex, co-morbidities, and  
455 COVID-19 waves.

456

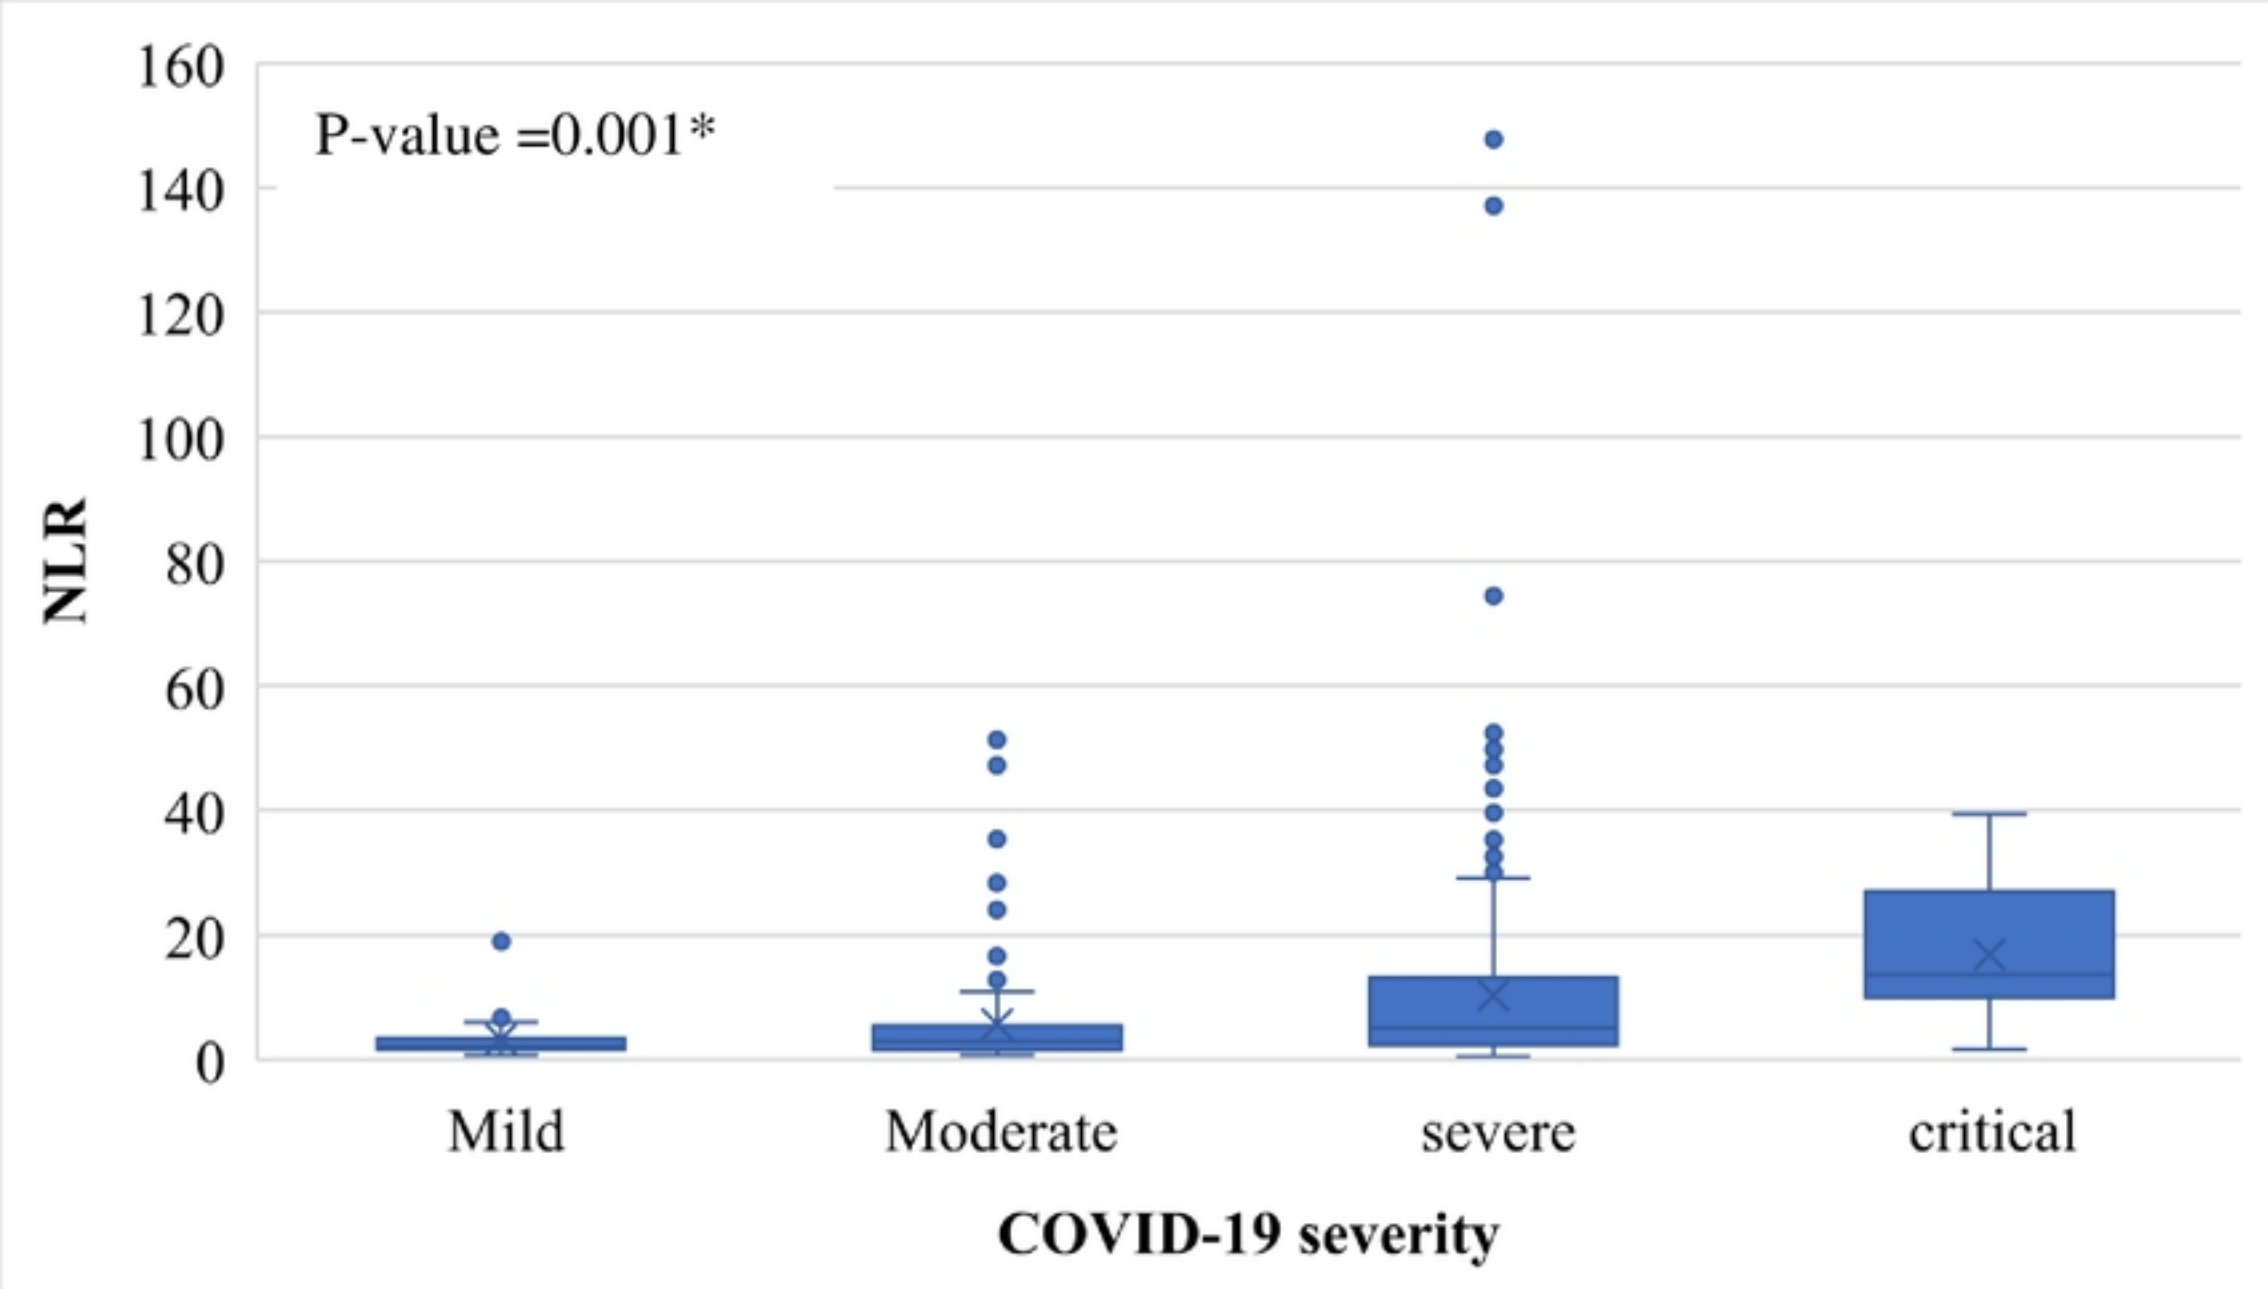

Figure 1: The distribution of NLR across categories of disease severity in COVID-19 patients admitted at KCMC Hospital (N = 504). \* P-value from Kruskal-Wallis test

Figure

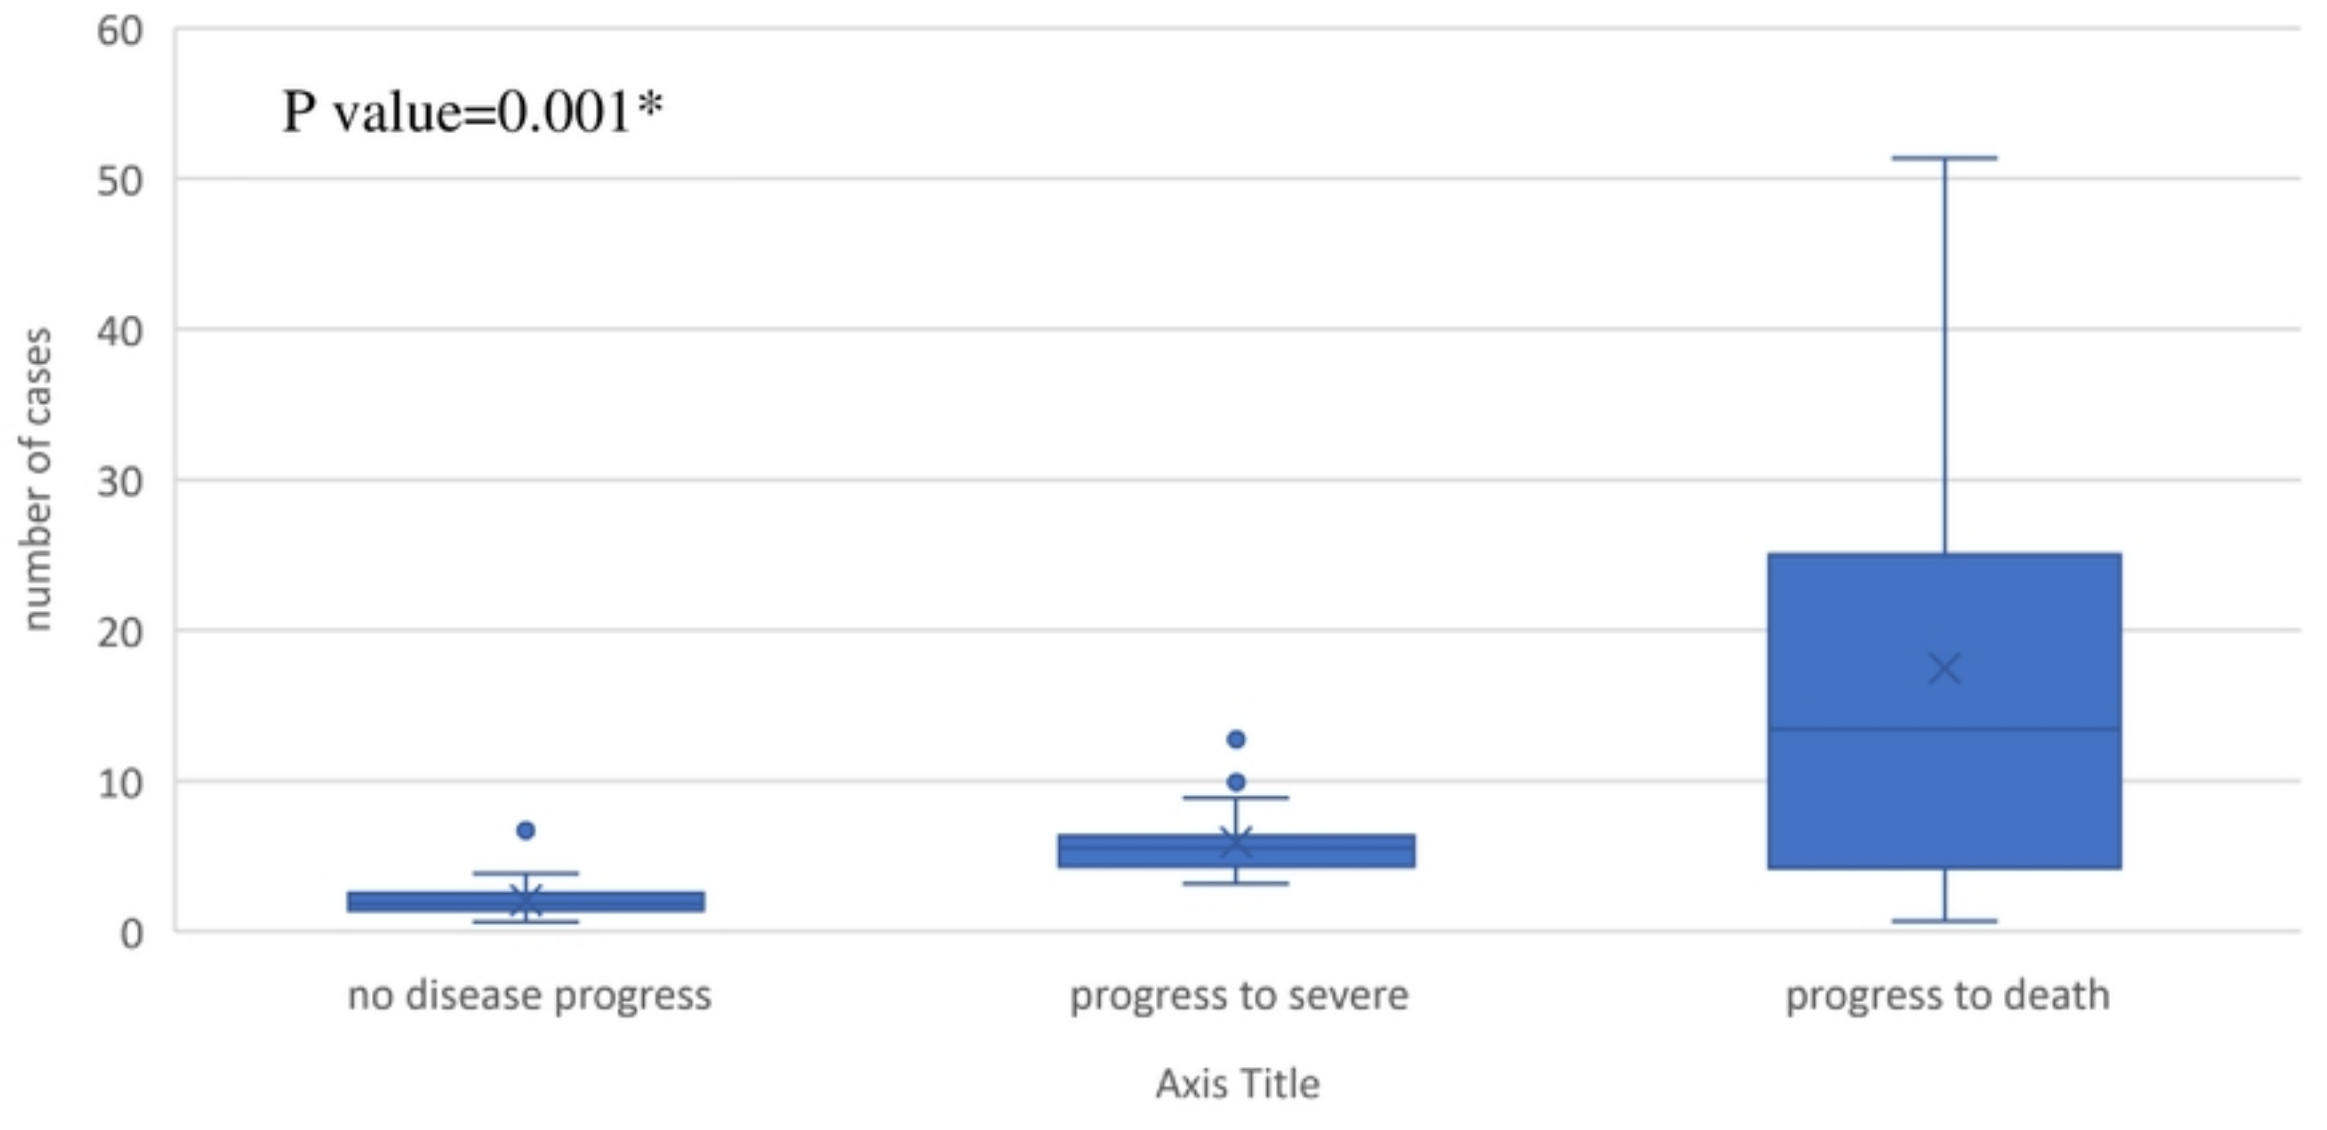

Figure 2: The distribution of NLR among patients with mild and moderate disease in relation to deterioration to severe disease or death. (N = 140). \* P-Value from Kruskal-Wallis test

Figure

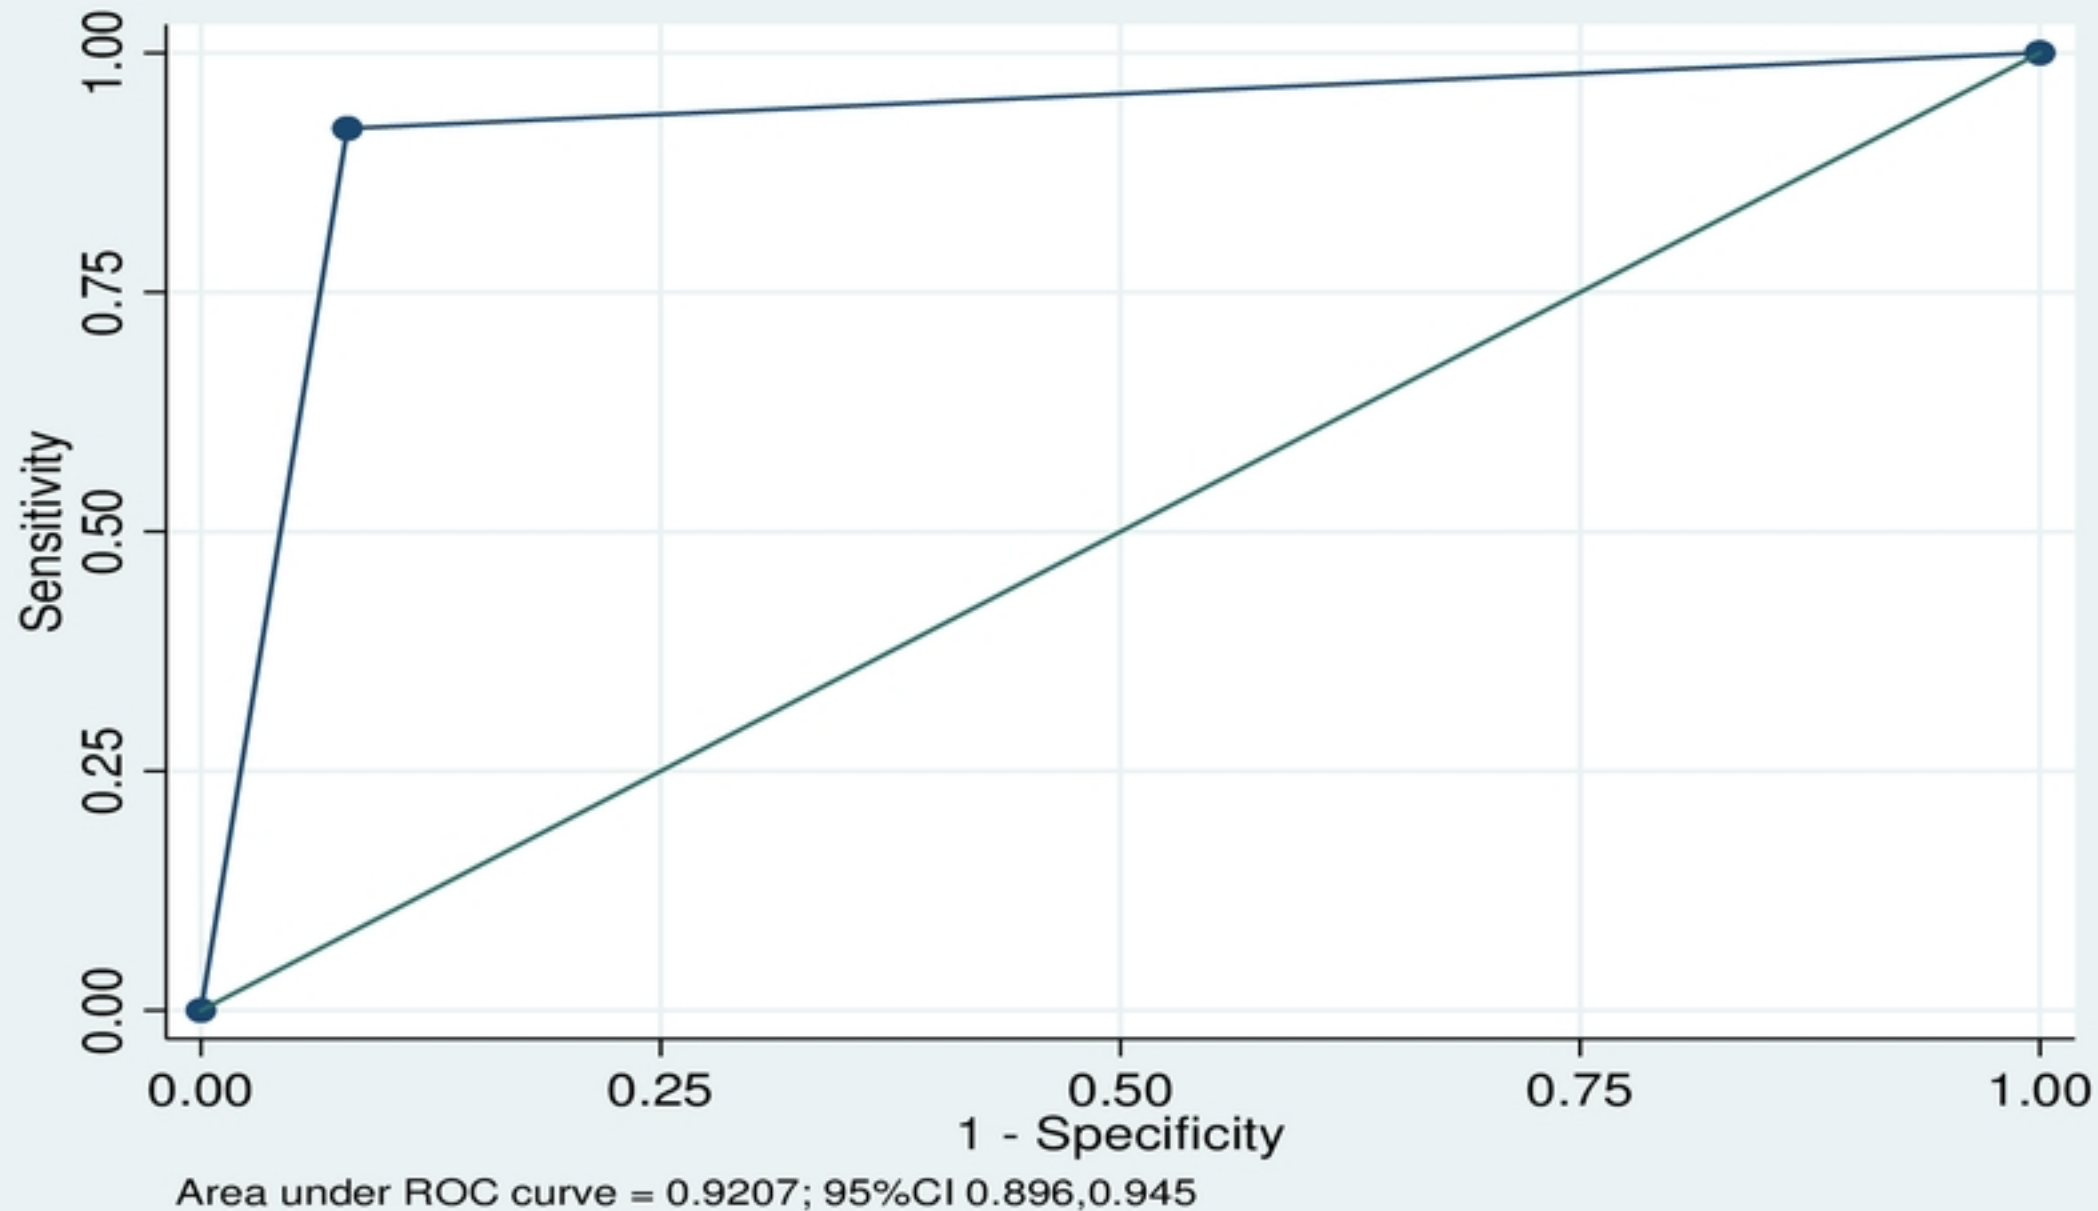

Figure 3: Diagnostic accuracy of NLR on predicting mortality among confirmed COVID-19 Patients at KCMC Hospital: March 2020 to March 2022. (N= 504).

Figure
